# Supplementary material for: Transient local adaptation and source–sink dynamics in experimental populations experiencing spatially heterogeneous environments
Source: PubMed Central journal article supplement (PMC6599998; doi:10.1098/rspb.2019.0738), 2019-06-26
Supplement: rspb20190738supp1.pdf [file rspb20190738supp1.pdf]

**SUPPLEMENTARY INFORMATION**

Bisschop, K., Mortier, F., Etienne, R. S., Bonte, D. (2019) Transient local adaptation and source-sink dynamics in experimental populations experiencing spatially heterogeneous environments, *Proceedings of the Royal Society B*, doi: 10.1098/rspb

**Table S1: Model selection for the fecundity tests.** Overview of the best models based on the lowest AICc with an AICc weight of at least 0.100. The total number of models was five in the control population and nineteen for experimental populations. Resource in the model is the homogeneous or heterogeneous environment and plant species where the mite came from.

|                                                                                      | Model                            | df | LogLik    | AICc   | Δ AICc | AICc weight |
|--------------------------------------------------------------------------------------|----------------------------------|----|-----------|--------|--------|-------------|
| <b>Ancestral versus novel host plants</b>                                            |                                  |    |           |        |        |             |
| <b>maximal model: performance ~ time * experiment/control + (1 block/island)</b>     |                                  |    |           |        |        |             |
| Bean                                                                                 | <b>Time * Experiment/Control</b> | 13 | -4797.299 | 9620.9 | 0.00   | 0.622       |
|                                                                                      | Time                             | 8  | -4803.254 | 9622.6 | 1.72   | 0.264       |
|                                                                                      | Time + Experiment/Control        | 9  | -4803.081 | 9624.3 | 3.40   | 0.114       |
| Cucumber                                                                             | <b>Experiment/Control</b>        | 5  | -4079.505 | 8169.1 | 0.00   | 0.668       |
|                                                                                      | No fixed variables               | 4  | -4081.728 | 8171.5 | 2.43   | 0.199       |
| Pepper                                                                               | <b>Time</b>                      | 9  | -1466.831 | 2951.8 | 0.00   | 0.642       |
|                                                                                      | Time + Experiment/Control        | 10 | -1466.640 | 2953.5 | 1.66   | 0.281       |
| <b>Interspecific competition and time</b>                                            |                                  |    |           |        |        |             |
| <b>maximal model: performance ~ competition * resource * time + (1 block/island)</b> |                                  |    |           |        |        |             |
| Bean                                                                                 | <b>Competition + Time</b>        | 9  | -4108.458 | 8235.1 | 0.00   | 0.755       |
|                                                                                      | Competition + Time + Resource    | 11 | -4108.178 | 8238.6 | 3.53   | 0.129       |
| Cucumber                                                                             | <b>Competition</b>               | 5  | -3482.708 | 6975.5 | 0.00   | 0.240       |
|                                                                                      | No fixed variables               | 4  | -3483.866 | 6975.8 | 0.29   | 0.207       |
|                                                                                      | Competition * Resource           | 9  | -3479.502 | 6977.2 | 1.72   | 0.101       |
|                                                                                      | Competition + Time               | 9  | -3479.509 | 6977.2 | 1.74   | 0.101       |
| Pepper                                                                               | <b>Time</b>                      | 8  | -1291.881 | 2599.9 | 0.00   | 0.467       |
|                                                                                      | Resource + Time                  | 10 | -1290.537 | 2601.3 | 1.40   | 0.232       |
|                                                                                      | Competition + Time               | 9  | -1291.831 | 2601.9 | 1.94   | 0.177       |

**Table S2: Chi-square statistics for the maximal models before model selection.** The results for the Wald Chi-square tests are presented for the maximal models. The first column with bean, cucumber, and pepper indicates the plant species where fecundity was measured on.

|                                                                                         | Independent variables         | Chisq   | Df | Pr(>Chisq) |     |
|-----------------------------------------------------------------------------------------|-------------------------------|---------|----|------------|-----|
| <b>Ancestral versus novel host plants</b>                                               |                               |         |    |            |     |
| Bean                                                                                    | Time                          | 88.0081 | 4  | <2.00E-16  | *** |
|                                                                                         | Experiment/Control            | 0.3495  | 1  | 0.55441    |     |
|                                                                                         | Time : Experiment/Control     | 11.6228 | 4  | 0.02039    | *   |
| Cucumber                                                                                | Time                          | 4.244   | 4  | 0.37399    |     |
|                                                                                         | Experiment/Control            | 5.6337  | 1  | 0.01762    | *   |
|                                                                                         | Time : Experiment/Control     | 2.4356  | 4  | 0.65621    |     |
| Pepper                                                                                  | Time                          | 81.5728 | 4  | <2e-16     | *** |
|                                                                                         | Experiment/Control            | 0.2015  | 1  | 0.6535     |     |
|                                                                                         | Time : Experiment/Control     | 5.7604  | 4  | 0.2178     |     |
| <b>Interspecific competition and time</b>                                               |                               |         |    |            |     |
| Bean                                                                                    | Resource                      | 0.5778  | 2  | 0.749085   |     |
|                                                                                         | Competition                   | 8.7494  | 1  | 0.003097   | **  |
|                                                                                         | Time                          | 73.7348 | 4  | 3.69E-15   | *** |
|                                                                                         | Resource : Competition        | 0.6358  | 2  | 0.727665   |     |
|                                                                                         | Resource : Time               | 7.8797  | 8  | 0.445308   |     |
|                                                                                         | Competition : Time            | 1.1322  | 4  | 0.889135   |     |
|                                                                                         | Resource : Competition : Time | 8.293   | 8  | 0.405389   |     |
| Cucumber                                                                                | Resource                      | 1.6767  | 2  | 0.43243    |     |
|                                                                                         | Competition                   | 2.8922  | 1  | 0.08901    | .   |
|                                                                                         | Time                          | 6.0704  | 4  | 0.19395    |     |
|                                                                                         | Resource : Competition        | 4.5489  | 2  | 0.10285    |     |
|                                                                                         | Resource : Time               | 3.0794  | 8  | 0.92928    |     |
|                                                                                         | Competition : Time            | 6.0623  | 4  | 0.19454    |     |
|                                                                                         | Resource : Competition : Time | 19.2584 | 8  | 0.01354    | *   |
| Pepper                                                                                  | Resource                      | 3.3926  | 2  | 0.1834     |     |
|                                                                                         | Competition                   | 0.1135  | 1  | 0.7362     |     |
|                                                                                         | Time                          | 41.805  | 4  | 1.83E-08   | *** |
|                                                                                         | Resource : Competition        | 0       | 2  | 1          |     |
|                                                                                         | Resource : Time               | 6.4407  | 8  | 0.598      |     |
|                                                                                         | Competition : Time            | 2.249   | 4  | 0.6901     |     |
|                                                                                         | Resource : Competition : Time | 7.4229  | 8  | 0.4918     |     |
| <b>Comparison between mites taken from cucumber and pepper in heterogeneous islands</b> |                               |         |    |            |     |
| Bean                                                                                    | Host plant                    | 0.0586  | 1  | 0.8087     |     |
|                                                                                         | Time                          | 45.3405 | 4  | 3.38E-09   | *** |
|                                                                                         | Host plant : Time             | 3.9073  | 4  | 0.4187     |     |
| Cucumber                                                                                | Host plant                    | 1.1013  | 1  | 0.294      |     |
|                                                                                         | Time                          | 4.74    | 4  | 0.315      |     |
|                                                                                         | Host plant : Time             | 1.5975  | 4  | 0.8092     |     |
| Pepper                                                                                  | Host plant                    | 0.1153  | 1  | 0.73422    |     |
|                                                                                         | Time                          | 63.2495 | 4  | 6.01E-13   | *** |
|                                                                                         | Host plant : Time             | 10.2238 | 4  | 0.03682    | *   |

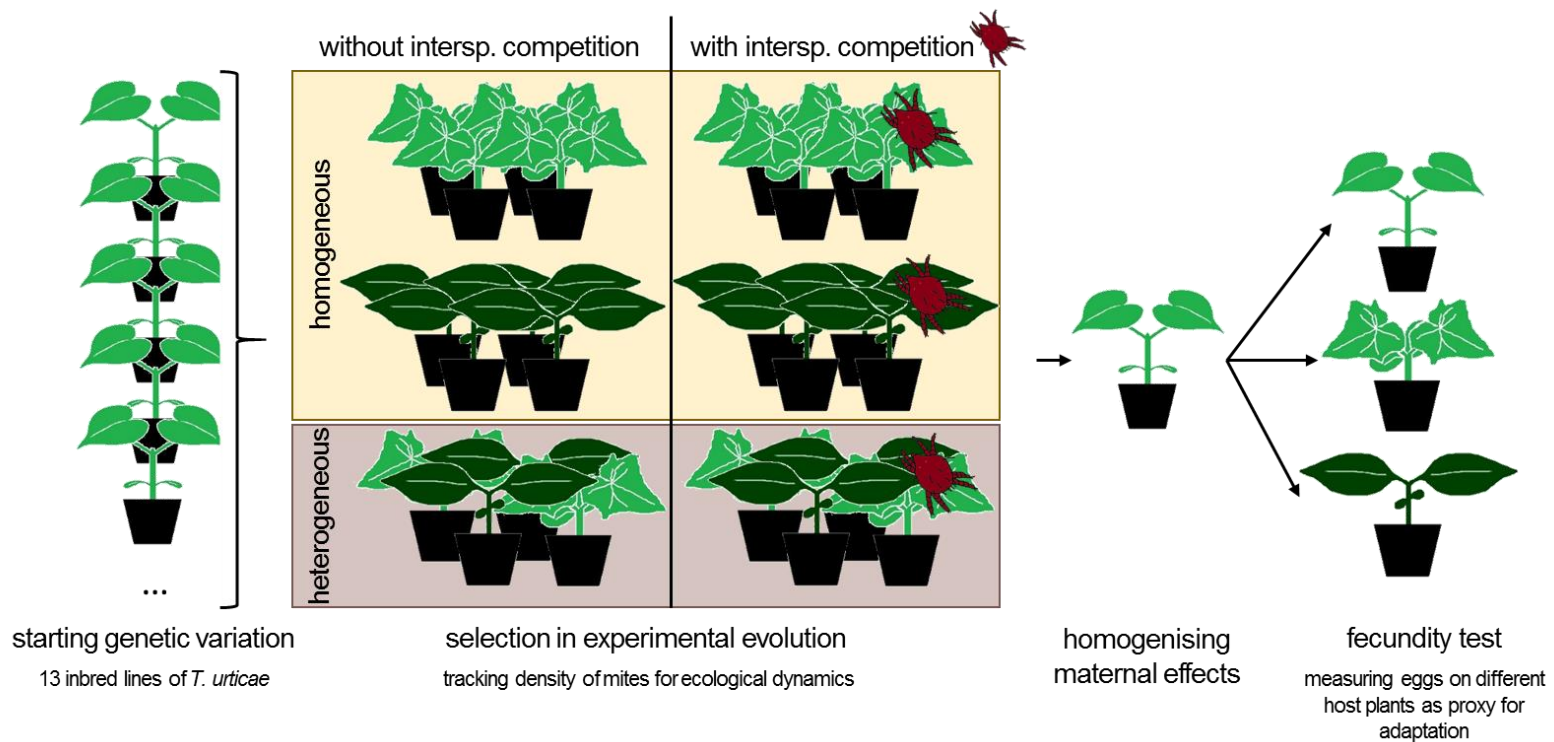

**Fig. S1. The experimental set-up.** Adult females from 13 inbred lines of *T. urticae* were equally divided over the different treatments to create the same starting genetic variation. The treatments were homogeneous islands with cucumber or pepper (yellow box), or heterogeneous with the combination of the two (brown box). Half of the islands was without interspecific competition, while the other half was with. The density of the populations of mites was tracked for ecological dynamics and fecundity tests were performed on the novel and initial host plants after two generations on the initial host plant for homogenising maternal effects.
